# Supplementary material for: Specificity and overlap in gene segment-defined antibody repertoires
Source: PubMed Central journal article supplement (PMC1277825; doi:10.1186/1471-2164-6-148), 2005-10-28
Supplement: 1471-2164-6-148-S1.pdf [file 1471-2164-6-148-S1.pdf]

Supporting Table 1: VDJ<sub>H</sub> repertoires for all specificities

| specificity               | observed VDJ <sub>H</sub> combinations                                                                                                                                                                                                                                                                                                                                                               |
|---------------------------|------------------------------------------------------------------------------------------------------------------------------------------------------------------------------------------------------------------------------------------------------------------------------------------------------------------------------------------------------------------------------------------------------|
| HBsAg (HBV)               | V1-46/D3-22/J5, V1-69/D3-9/J6, V3-20/D3-3/J6, V3-21/D1-26/J5,<br>V3-23/D1-26/J4, V3-23/D6-13/J4, V3-30/D3-9/J4, V3-30/D5-5/J4 (2),<br>V3-49/D5-12/J4, V4-39/D3-10/J6, V4-4/D3-10/J4                                                                                                                                                                                                                  |
| Fab (human)               | V1-2/D3-10/J6, V3-15/D3-10/J4, V3-23/D5-5/J4, V3-48/D3-16/J6,<br>V3-7/D6-25/J4, V3-73/D3-10/J6 (2), V3-74/D1-26/J4, V4-39/D1-1/J6,<br>V5-51/D1-26/J5, V5-51/D3-9/J4                                                                                                                                                                                                                                  |
| gp120 (HIV)               | V1-24/D1-26/J4, V1-69/D1-14/J6, V1-69/D1-7/J6, V1-69/D2-2/J4,<br>V1-69/D2-2/J6, V1-69/D2-8/J5 (2), V1-69/D3-22/J4, V1-69/D3-3/J6 (2),<br>V1-69/D3-9/J2, V1-69/D4-17/J6, V1-69/D4-23/J3, V1-69/D4-4/J2,<br>V1-69/D5-12/J1, V1-69/D6-19/J4, V1-f/D1-26/J3, V1-f/D1-7/J4,<br>V1-f/D2-15/J4, V2-5/D3-3/J5, V3-23/D3-3/J4, V3-30-3/D3-3/J3,<br>V3-64/D3-22/J3, V4-31/D3-3/J3, V4-39/D5-5/J4, V4-4/D6-6/J5 |
| gpIIb/IIIa (human)        | V1-2/D3-10/J6, V1-2/D5-5/J4, V1-69/D2-2/J4, V3-20/D2-2/J3,<br>V3-21/D1-14/J3, V3-23/D3-10/J4, V3-30/D3-22/J4, V3-30-3/D3-16/J4,<br>V3-49/D1-14/J6, V4-39/D4-4/J4, V4-4/D3-22/J3, V5-51/D1-7/J3,<br>V5-51/D2-21/J4, V6-1/D6-19/J4                                                                                                                                                                     |
| PS ( <i>S. pneumo</i> 6B) | V3-15/D3-3/J4, V3-15/D5-5/J4, V3-23/D2-2/J1 (3), V3-23/D3-9/J4 (5),<br>V3-23/D4-23/J1, V3-23/D6-19/J4 (2), V3-30/D2-2/J4 (3), V3-7/D1-26/J4<br>(4), V3-7/D1-7/J4 (5), V3-7/D3-16/J4 (15), V3-73/D3-10/J6                                                                                                                                                                                             |
| TPO (human)               | V1-2/D3-9/J6 (2), V1-3/D1-26/J6 (2), V1-3/D2-8/J4, V1-3/D3-10/J3,<br>V1-3/D3-10/J4 (2), V1-3/D4-17/J4 (2), V1-3/D4-4/J4 (3), V1-3/D5-24/J6,<br>V1-69/D3-10/J6 (8), V1-69/D4-17/J5, V1-8/D1-26/J6, V3-21/D1-1/J5<br>(2), V3-21/D3-16/J5, V3-21/D3-9/J5, V3-21/D5-12/J5 (12),<br>V5-51/D5-5/J6                                                                                                         |

Supporting Table 1: VDJ<sub>H</sub> repertoires for all specificities, continued

| specificity                | VDJ <sub>H</sub> combination                                                                                                                                                                                                                                                                                                                    |
|----------------------------|-------------------------------------------------------------------------------------------------------------------------------------------------------------------------------------------------------------------------------------------------------------------------------------------------------------------------------------------------|
| MAG (human)                | V1-8/D6-19/J6, V3-15/D1-26/J5, V3-15/D3-10/J3, V3-15/D4-17/J4,<br>V3-48/D3-22/J4, V3-9/D6-19/J3, V4-4/D3-3/J5, V4-61/D3-3/J3,<br>V4-b/D2-2/J5                                                                                                                                                                                                   |
| cardiolipin (human)        | V1-2/D2-15/J4, V1-2/D5-12/J4, V1-3/D3-3/J4, V1-69/D3-16/J3,<br>V1-69/D3-3/J4, V2-5/D3-3/J5 (2), V3-21/D5-5/J4 (2), V3-48/D1-26/J5,<br>V3-48/D6-19/J4, V4-b/D5-5/J4                                                                                                                                                                              |
| RhD (human)                | V1-2/D1-26/J3, V1-2/D2-15/J4, V1-2/D3-16/J6, V1-2/D3-22/J3,<br>V1-69/D6-13/J6, V2-26/D4-4/J6 (2), V3-21/D3-9/J6, V3-30/D3-10/J6<br>(2), V3-30/D3-22/J3, V3-30-3/D2-21/J6, V3-33/D2-21/J6,<br>V3-33/D3-22/J6, V3-33/D3-3/J6, V3-33/D4-17/J4, V3-33/D4-23/J6,<br>V3-33/D6-19/J5, V4-34/D3-10/J4, V4-34/D3-16/J4, V4-34/D6-6/J6,<br>V4-39/D6-13/J2 |
| factor VIII (human)        | V1-18/D3-3/J6 (3), V1-24/D2-2/J4 (2), V1-24/D3-3/J3, V1-69/D3-10/J6<br>(10), V1-69/D3-9/J3 (2), V1-69/D6-13/J3                                                                                                                                                                                                                                  |
| PS ( <i>S. pneumo</i> 23F) | V3-23/D1-1/J4 (2), V3-23/D1-1/J5, V3-23/D1-26/J5, V3-23/D3-3/J6,<br>V3-23/D5-5/J4 (2), V3-30/D3-10/J4, V3-30/D5-24/J4 (2),<br>V3-30/D6-19/J4 (2), V3-33/D6-25/J4, V3-48/D6-13/J2 (4),<br>V3-64/D6-6/J6 (4), V3-7/D3-10/J4, V4-59/D3-10/J5                                                                                                       |
| <i>E. histolytica</i>      | V1-18/D4-4/J4, V1-46/D4-23/J4, V3-21/D2-15/J6, V3-30/D2-2/J6 (3),<br>V3-48/D2-2/J4, V3-53/D6-6/J4, V3-64/D2-15/J4                                                                                                                                                                                                                               |

Supporting Table 1: VDJ<sub>H</sub> repertoires for all specificities, continued

| specificity    | VDJ <sub>H</sub> combination                                                                                                                                                                                                                                                                                                   |
|----------------|--------------------------------------------------------------------------------------------------------------------------------------------------------------------------------------------------------------------------------------------------------------------------------------------------------------------------------|
| DNA (human)    | V1-46/D2-2/J3, V1-46/D3-16/J3, V1-46/D3-9/J4, V1-69/D4-17/J3,<br>V1-8/D1-1/J5, V2-5/D6-19/J4, V3-30/D6-6/J4, V3-33/D3-9/J3,<br>V3-33/D3-9/J4, V3-33/D5-5/J3, V3-48/D2-2/J5, V3-7/D1-1/J4,<br>V3-7/D2-15/J4 (2), V3-9/D1-26/J5, V3-9/D1-7/J3, V3-9/D2-15/J4,<br>V3-9/D2-21/J5, V4-31/D5-5/J5, V4-34/D1-1/J6, V4-59/D6-13/J6 (2) |
| PL (human)     | V1-2/D3-9/J5, V1-3/D3-10/J4, V3-23/D3-10/J4, V3-74/D2-21/JH4,<br>V4-31/D3-3/J4, V4-34/D2-2/J6, V4-39/D1-26/J4, V4-39/D5-24/J4,<br>V6-1/D6-13/J4                                                                                                                                                                                |
| dsDNA (human)  | V3-23/D1-1/J2, V3-23/D4-17/J4, V3-30/D3-22/J3, V3-64/D4-17/J5,<br>V3-66/D2-2/J3, V3-74/D3-22/J3, V4-59/D2-21/J4, V5-51/D4-23/J5                                                                                                                                                                                                |
| myosin (human) | V1-2/D2-15/J5, V1-2/D6-13/J3, V1-46/D2-2/J4, V1-69/D6-13/J2,<br>V2-5/D7-27/J4, V3-15/D3-22/J4, V3-30/D2-2/J4, V3-30/D3-16/J4,<br>V3-43/D5-24/J3, V3-48/D1-26/J3, V3-53/D3-10/J4, V3-9/D3-10/J1,<br>V4-59/D1-7/J4, V6-1/D1-7/J3                                                                                                 |

Numbers in parentheses () indicate the multiplicity of sequences that used this VDJ<sub>H</sub> combination.
